# Supplementary material
Source: PubMed Central journal article supplement (PMC4209368)
Supplement: 97320630010586S1.pdf [file 97320630010586S1.pdf]

## Supplementary material:

**Table 1:** *Turritopsis nutricula* with its most related individuals *T. Dohrnii*, *T. Rubra*, *Hydractinia sp.*, *Podocoryna borealis*, *Symplectoscyphus tricuspoidatus*, *Halecium delicatulum*, *Euchelota menoni*, *Bimeria vestita* and *Salacia desmoides* arranged according to their E-Value and Max Ident based on gene relative study.

| Relative Species                                                                                                      | Max score | Total score | Query coverage | E value   | Max Ident |
|-----------------------------------------------------------------------------------------------------------------------|-----------|-------------|----------------|-----------|-----------|
| <i>Turritopsis nutricula</i> isolate WHOI_1 16S ribosomal RNA gene, partial sequence; mitochondrial                   | 1081      | 1081        | 100%           | 0         | 100%      |
| <i>Turritopsis sp.</i> 1 MPM-2008 isolate Bocas_2 16S ribosomal RNA gene, partial sequence; mitochondrial             | 1037      | 1037        | 100%           | 0         | 99%       |
| <i>Turritopsis dohrnii</i> isolate Fort Pierce_2 16S ribosomal RNA gene, partial sequence; mitochondrial              | 961       | 961         | 100%           | 0         | 96%       |
| <i>Turritopsis rubra</i> isolate Japan_1 16S ribosomal RNA gene, partial sequence; mitochondrial                      | 778       | 778         | 100%           | 0         | 91%       |
| <i>Hydractinia sp.</i> 1 MPM-2009 isolate 078 16S ribosomal RNA gene, partial sequence; mitochondrial                 | 614       | 614         | 99%            | 3.00E-172 | 86%       |
| <i>Podocoryna borealis</i> isolate 152 16S ribosomal RNA gene, partial sequence; mitochondrial                        | 601       | 601         | 99%            | 2.00E-168 | 85%       |
| <i>Symplectoscyphus tricuspoidatus</i> voucher MNHN INVE29953 16S ribosomal RNA gene, partial sequence; mitochondrial | 599       | 599         | 99%            | 8.00E-168 | 85%       |
| <i>Halecium delicatulum</i> mitochondrial partial 16S rRNA gene, isolated from Antarctica, Ross Sea                   | 595       | 595         | 99%            | 1.00E-166 | 85%       |
| <i>Euchelota menoni</i> voucher MHNG INVE33457 16S ribosomal RNA gene, partial sequence; mitochondrial                | 590       | 590         | 100%           | 5.00E-165 | 85%       |
| <i>Bimeria vestita</i> mitochondrial partial 16S rRNA gene                                                            | 590       | 590         | 99%            | 5.00E-165 | 85%       |
| <i>Salacia desmoides</i> 16S ribosomal RNA gene, partial sequence; mitochondrial                                      | 588       | 588         | 100%           | 2.00E-164 | 85%       |

**Table 2:** *Turritopsis nutricula* with its most related individuals *Clytia sp.*, *Eirene ceylonensis*, *Nemopsis bachei*, *Clytia folleata*, *Clytia elsaeoswaldae*, *Obelia bidentata*, *Clytia gracilis*, *Eirene brevistylus* and *Turritopsis lata* arranged according to their E-Value and Max Ident based on 16s rRNA relative study.

| Relative Species                                                                                            | Max score | Total score | Query coverage | E value   | Max ident |
|-------------------------------------------------------------------------------------------------------------|-----------|-------------|----------------|-----------|-----------|
| <i>Turritopsis nutricula</i> isolate 1 cytochrome oxidase subunit I (COI) gene, partial cds; mitochondrial  | 1147      | 1147        | 100%           | 0         | 100%      |
| <i>Clytia sp.</i> KC JRH-2012 isolate 1 cytochrome oxidase subunit I (COI) gene, partial cds; mitochondrial | 625       | 625         | 98%            | 1.00E-175 | 85%       |
| <i>Eirene ceylonensis</i> isolate 3 cytochrome oxidase subunit I (COI) gene, partial cds; mitochondrial     | 625       | 625         | 99%            | 1.00E-175 | 85%       |
| <i>Nemopsis bachei</i> mitochondrion, partial genome                                                        | 625       | 625         | 99%            | 1.00E-175 | 85%       |
| <i>Clytia folleata</i> cytochrome oxidase subunit I (COI) gene, partial cds; mitochondrial                  | 619       | 619         | 99%            | 7.00E-174 | 85%       |
| <i>Clytia elsaeoswaldae</i> cytochrome oxidase subunit I gene, partial cds; mitochondrial                   | 619       | 619         | 97%            | 7.00E-174 | 85%       |
| <i>Obelia bidentata</i> voucher 76NC cytochrome oxidase subunit I (COI) gene, partial cds; mitochondrial    | 619       | 619         | 95%            | 7.00E-174 | 85%       |
| <i>Clytia gracilis</i> voucher Brazil.5 cytochrome oxidase subunit I (COI) gene, partial cds; mitochondrial | 617       | 617         | 98%            | 2.00E-173 | 85%       |
| <i>Eirene brevistylus</i> isolate 4 cytochrome oxidase subunit I (COI) gene, partial cds; mitochondrial     | 614       | 614         | 99%            | 3.00E-172 | 85%       |
| <i>Turritopsis lata</i> cytochrome oxidase subunit I (COI) gene, partial cds; mitochondrial                 | 593       | 593         | 100%           | 4.00E-166 | 84%       |

**Table 3:** *Turritopsis nutricula* with its most related individuals *Turritopsis lata*, *Didiscus sp.*, *Tiaricodon coeruleus*, *Amphinema dinema*, *Laodicea undulata*, *Bougainvillia muscus*, *Clytia sp.*, *Eirene ceylonensis*, *Eutima levuka*, *Eucheilota menoni* and *Helgicirrho malayensis* arranged according to their E-Value and Max Indent based on protein relative study.

| Description                                                                             | Max score | Total score | Query coverage | E value   | Max ident |
|-----------------------------------------------------------------------------------------|-----------|-------------|----------------|-----------|-----------|
| cytochrome oxidase subunit I, partial (mitochondrion) [ <i>Turritopsis nutricula</i> ]  | 407       | 407         | 100%           | 1.00E-142 | 100%      |
| cytochrome oxidase subunit I, partial (mitochondrion) [ <i>Turritopsis lata</i> ]       | 362       | 362         | 100%           | 6.00E-125 | 97%       |
| cytochrome oxidase subunit I [ <i>Didiscus sp.</i> UCMPWC1040]                          | 363       | 363         | 100%           | 6.00E-125 | 87%       |
| cytochrome oxidase subunit I, partial (mitochondrion) [ <i>Tiaricodon coeruleus</i> ]   | 359       | 359         | 100%           | 9.00E-124 | 96%       |
| cytochrome oxidase subunit I, partial (mitochondrion) [ <i>Amphinema dinema</i> ]       | 353       | 353         | 100%           | 3.00E-121 | 97%       |
| cytochrome oxidase subunit I, partial (mitochondrion) [ <i>Laodicea undulata</i> ]      | 350       | 350         | 100%           | 4.00E-120 | 97%       |
| cytochrome oxidase subunit I, partial (mitochondrion) [ <i>Bougainvillia muscus</i> ]   | 350       | 350         | 100%           | 5.00E-120 | 94%       |
| cytochrome oxidase subunit I, partial (mitochondrion) [ <i>Clytia sp.</i> KC JRH-2012]  | 349       | 349         | 100%           | 7.00E-120 | 97%       |
| cytochrome oxidase subunit I, partial (mitochondrion) [ <i>Eirene ceylonensis</i> ]     | 349       | 349         | 100%           | 8.00E-120 | 97%       |
| cytochrome oxidase subunit I, partial (mitochondrion) [ <i>Eutima levuka</i> ]          | 349       | 349         | 100%           | 9.00E-120 | 97%       |
| cytochrome oxidase subunit I, partial (mitochondrion) [ <i>Eucheilota menoni</i> ]      | 349       | 349         | 100%           | 9.00E-120 | 97%       |
| cytochrome oxidase subunit I, partial (mitochondrion) [ <i>Helgicirrho malayensis</i> ] | 349       | 349         | 100%           | 1.00E-119 | 97%       |
